# Supplementary material for: Antitumor effects of iPSC-based cancer vaccine in pancreatic cancer
Source: PubMed Central journal article supplement (PMC8190592; doi:10.1016/j.stemcr.2021.04.004), 2021-05-06
Supplement: mmc1.pdf [file mmc1.pdf]

**Stem Cell Reports, Volume 16**

**Supplemental Information**

**Antitumor effects of iPSC-based cancer vaccine in pancreatic cancer**

**Xiaoming Ouyang, Yu Liu, Yang Zhou, Jing Guo, Tzu-Tang Wei, Chun Liu, Bomi Lee, Binbin Chen, Angela Zhang, Kerriann M. Casey, Lin Wang, Nigel G. Kooreman, Aida Habtezion, Edgar G. Engleman, and Joseph C. Wu**

## SUPPLEMENTAL MATERIALS

### **Antitumor Effects of iPSC-Based Cancer Vaccine in Pancreatic Cancer**

Xiaoming Ouyang, PhD<sup>1,2</sup>, Yu Liu, PhD<sup>1,2</sup>, Yang Zhou, MS<sup>1,2</sup>, Jing Guo, PhD<sup>3</sup>,  
Tzu-Tang Wei, PhD<sup>1,2</sup>, Chun Liu, PhD<sup>1,2</sup>, Bomi Lee, PhD<sup>4</sup>, Binbin Chen, PhD<sup>5</sup>, Angela Zhang,  
BS<sup>1,2</sup>, Kerriann M. Casey, DVM, DACVP<sup>6</sup>, Lin Wang, PhD<sup>1,2</sup>, Nigel G. Kooreman, MD, PhD<sup>8</sup>,  
Aida Habtezion, MD, MSc<sup>4</sup>, Edgar G. Engleman, MD<sup>7\*</sup>, Joseph C. Wu, MD, PhD<sup>1,2\*</sup>

<sup>1</sup>Stanford Cardiovascular Institute, <sup>2</sup>Department of Medicine, Division of Cardiovascular Medicine, Stanford University, <sup>3</sup>Department of Microbiology and Immunology, <sup>4</sup>Department of Medicine, Division of Gastroenterology & Hepatology, <sup>5</sup>Department of Genetics, <sup>6</sup>Department of Comparative Medicine, <sup>7</sup>Department of Pathology, Stanford University, Stanford, CA 94305, USA, <sup>8</sup>Department of Surgery, Leiden University Medical Center, Leiden, ZA 2333, the Netherlands

## **Supplemental Experimental Procedures**

**Generation of murine iPSCs.** Murine iPSCs from C57BL/6J mice were generated as previously described (Kooreman et al., 2018). Briefly, fibroblasts from C57BL/6J (The Jackson Laboratory) were transfected with a Neon transfection system (ThermoFisher Scientific) with a codon-optimized mini-intronic plasmid (coMIP) (Diecke et al., 2015). After transfection, cells were cultured on irradiated mouse embryonic feeder cells in DMEM with 15% FBS, MEM Non-Essential Amino Acids (Gibco), and 10 ng/ml murine leukemia inhibiting factor (mLIF; EMD Millipore). Murine iPSC colonies were manually picked and allowed to grow for a few passages, followed by sorting for SSEA-1 using magnetic bead sorting (Miltenyi) to obtain a pure pluripotent population.

**Maintenance of murine iPSC line.** Murine C57BL/6J iPSC line was maintained in the MEK inhibition (MEKi) and GSK3 inhibition (GSK3i) with leukemia inhibitory factor condition without feeder cells in KnockOut™ DMEM (Gibco) with 15% KnockOut™ Serum Replacement (Gibco), 2 mM GlutaMax, Non-essential Amino Acids (Gibco), 100 μM β-mercaptoethanol (SigmaAldrich), 0.5 μM ERK-Inhibitor PD0325901 (Selleck Chemicals), 3 μM GSK-3α/β inhibitor CHIR99021 (Selleck Chemicals), and 10 ng/ml LIF (Millipore) (Silva et al., 2008). Cells were tested for pluripotent marker expression and were tested negative for mycoplasma contamination using the MycoAlert Detection Kit (Lonza). Before use, cells were sorted for SSEA-1 using magnetic bead sorting (Miltenyi) to obtain an enriched pluripotent population.

**Histopathology of tumors.** The tumors were explanted from mice and processed for histopathology at time of sacrifice. Briefly, the organs were fixed in 4% paraformaldehyde for 72 hr and transferred to 70% ethanol. Fixed samples were embedded in paraffin and sections were cut and stained with hematoxylin and eosin (H&E) for histological analysis by an expert veterinary pathologist (K.M.C).

**Cytometry by Time-of-Flight (CyTOF).** Immune cells were isolated from tumor draining lymph nodes (TDLNs) and dissociated into a single-cell suspension by pressing the tissue with the plunger of a 3 ml-syringe against a 70  $\mu\text{m}$  strainer. ACK lysing buffer (Quality Biological) was used to remove any red blood cells. Cells were stimulated with PMA/ionomycin for 4 hr together with Brefeldin A. After stimulation, cells were stained with the maxpar mouse spleen/lymph node phenotyping kit (Fluidigm), as well as the maxpar mouse intracellular cytokine I panel kit (Fluidigm) plus anti-mouse FOXP3 and anti-mouse Ki67 antibodies conjugated in-house, and the viability dye Cisplatin (Fluidigm) using the FOXP3/Transcription factor staining buffer set (eBioscience) according to the manufacturer's instructions. Cells were resuspended in MaxPar water at a concentration of  $1 \times 10^5$ - $1 \times 10^7$  cells/mL with the addition of normalization beads and run on a CyTOF2 (Fluidigm) machine. The resulting data were normalized using the normalization beads. The data were analyzed using Cytobank online software (Kotecha et al., 2010) for viSNE (Amir et al., 2013), FLOW-SOM (Gassen et al., 2015) and SPADE (Qiu et al., 2011).

**IgG binding assay.** Cells were washed twice with PBS and resuspended in 100  $\mu\text{l}$  FACS buffer with the addition of 2  $\mu\text{l}$  of serum from the C+I vaccine or PBS treated mice and incubated for

30 min on 4°C. Following incubation, cells were washed twice and incubated with an Anti-IgG (minimal x-reactivity) Goat Polyclonal Antibody (Alexa Fluor® 594) [clone: Poly4053] (BioLegend) for another 20 min on 4°C. Unstained cells were included as negative controls. The cells were then analyzed using the BD FACSymphony™ Flow Cytometer.

**Flow cytometry.** For the immune profiling of immune cells in the spleen, splenocytes were isolated and incubated with ACK lysing buffer (Quality Biological) to remove red blood cells. Cytokine secretion were blocked for 4 hr by Brefeldin A. Cells were incubated with Panc02 cell lysate or PBS. After incubation, cells were stained with antibodies for surface markers containing CD3 (BioLegend Cat# 100231), CD4 (BioLegend Cat# 116022), CD8a (BioLegend Cat# 100734), CD45 (BioLegend Cat# 103137), and the intracellular markers IL-2 (BD Pharmingen), Granzyme-B (eBioscience), TNF- $\alpha$  (BD Pharmingen), and IFN- $\gamma$  (Biolegend). A fixable viability dye LIVE/DEAD™ Fixable Near-IR Stain (Thermofisher) was added to exclude dead cells from the analysis. Cells were stained using the FOXP3/Transcription factor staining buffer set (eBioscience) according to the manufacturer's instructions. Samples were analyzed on the LSR-II Flow Cytometer analyzer in the Stanford Shared FACS Facility.

**TCGA data sets.** Publicly available TCGA patient data sets were used to analyze the percentages of genomic and transcriptomic alterations in cancer-iPSC signature genes in human tumors of major cancer types. The patient cohorts include pancreatic cancer (Hoadley et al., 2018; Witkiewicz et al., 2015), melanoma (Hoadley et al., 2018), esophagogastric cancer (Hoadley et al., 2018), non-small cell lung cancer (Campbell et al., 2016), ovarian epithelial tumor (Hoadley et al., 2018), head and neck cancer (Hoadley et al., 2018), invasive breast

carcinoma (Ciriello et al., 2015), hepatocellular carcinoma (Hoadley et al., 2018), prostate cancer (Armenia et al., 2018), colorectal adenocarcinoma (Hoadley et al., 2018), glioma (Brennan et al., 2013), and germ cell tumor (Bagrodia et al., 2016).

**TCGA data analysis using the cBioPortal and R.** Publicly available TCGA patient data sets were used to analyze the percentages of transcriptomic alterations in cancer-iPSC signature genes in human tumors of major cancer types. The cBioPortal (<http://cbioportal.org>) tool (Cerami et al., 2012; Gao et al., 2013) was used for analyzing TCGA data. The patient survival information with or without mRNA overexpression in iPSC-cancer signature genes was queried using cBioportal analysis on TCGA's PanCancer Atlas cohorts. To determine the enrichment scores of the iPSC-cancer signature genes in TCGA tumors, we performed a single-sample Gene Set Enrichment Analysis (ssGSEA) using the GSVA package in R. TCGA RNA sequencing data of tumor samples were downloaded from <https://portal.gdc.cancer.gov/>.

**RNA sequencing data analysis.** For RNA-seq data, quality was examined by way of analyzing per base sequence quality plots using FastQC. The trimming of sequence reads was done by TrimGalore. RNA-seq reads were aligned to the mouse genome (mm10) using the STAR software (Dobin et al., 2013). Reads that overlapped with exon coordinates were counted using RSEM and feautrecounts (Li and Dewey, 2011; Liao et al., 2014). Raw read counts were transformed using the variance stabilizing transformation (VST) function included in the DESeq2 R package. Mean and standard deviations of normalized expressions were calculated for each gene. Z-scores were determined by subtracting the mean from each expression value and dividing by the standard deviation. Differentially expressed genes (DEG) between different

groups were identified using DESeq2 R package (Anders and Huber, 2010). Genes with a Benjamin-Hochberg corrected  $p < 0.05$  were considered significant. The RNA-seq expression data sets were downloaded from GEO projects (GEO: GSE157185, GSE160434, GSM4077903 and GSE36294).

**Gene Set Enrichment Analysis (GSEA).** We utilized the Software “GSEA 4.1.0” (Subramanian et al., 2005) to perform GSEA analysis of iPSC-cancer signature genes as a user-defined gene set with Panc02, mouse iPSCs, and mouse embryonic fibroblasts (MEF) RNA-seq expression data.  $FDR < 0.001$  and  $P < 0.001$  was regarded as statistically significant.

**Peptide immunogenicity prediction.** Immunogenic peptides in iPSC-cancer signature gene were predicted with machine learning algorithms NetMHCpan4.0 and MARIA to identify T cell epitopes highly presentable by HLA alleles (human MHC I and II). For NetMHCpan4.0, we scanned 9-mer peptides in the iPSC-cancer signature genes, and for MARIA we scanned 15-mer peptides. We ranked candidate T cell epitopes by binding affinity and selected epitopes that are presentable by more than 50% of inputted common MHC I alleles and 100% of inputted common MHC II alleles among the US population. We validated the prediction by searching these top candidates with 90% sequence similarity in The Immune Epitope Database (IEDB).

**Quantification and statistical analyses.** All values in bar graphs and curves are expressed as means  $\pm$  SEM. Intergroup differences were appropriately assessed by either unpaired two-tailed Student's t-test or one-way analysis of variance (ANOVA) with multiple comparison tests using PRISM GraphPad software. \* $P < 0.05$ , \*\* $P < 0.01$ , \*\*\* $P < 0.001$ , \*\*\*\* $P < 0.0001$ .

## Supplementary Figure Legend

### **Supplementary Figure 1. H&E staining of mouse tumors confirmed tumor morphology.**

H&E staining showing histology of mouse tumors from mice treated with PBS, iPSC alone, CpG alone, and the C+I vaccine. NT, no tumors.

### **Supplementary Figure 2. FlowSOM results for one representative mouse treated with PBS or the C+I vaccine as Minimum Spanning Tree (MST) grid. (A) Heatmap representing the expression of the indicated markers within the metaclusters. (B-C) FlowSOM was performed using 225 clusters and 10 metaclusters. Each cluster was represented by one pie chart, and metaclusters were denoted by background shading. Major differences observed in metaclusters 10 and 6 between PBS and the C+I vaccine treated mice are outlined in dark blue (CD8<sup>+</sup> T cells) and light blue (CD4<sup>+</sup>FOXP3<sup>+</sup> Treg cells).**

Heatmap representing the expression of the indicated markers within the metaclusters. FlowSOM was performed using 225 clusters and 10 metaclusters. Each cluster was represented by one pie chart, and metaclusters were denoted by background shading. Major differences observed in metaclusters 10 and 6 between PBS and the C+I vaccine treated mice are outlined in dark blue (CD8<sup>+</sup> T cells) and light blue (CD4<sup>+</sup>FOXP3<sup>+</sup> Treg cells).

### **Supplementary Figure 3. The C+I vaccine increases serum IgG binding to miPSCs and cancer cells, increases recruitment of plasmacytic dendritic cells (pDCs) in tumor draining lymph nodes, and stimulates cancer cell specific IFN $\gamma$ <sup>+</sup> cytotoxic T cells in spleen, but does not increase systemic cytokine levels nor affect mouse body weight production compared to PBS controls. (A) Increased percentage of serum IgG binding to miPSCs and murine PDAC cancer cells from C+I vaccine treated mice compared to PBS treated controls, without a significant increase in non-specific fibroblast binding ( $n=3$ , mean $\pm$ SEM, Student's t-test). (B) Percentage of pDCs (CD45<sup>+</sup>CD11c<sup>+</sup>NK1.1<sup>-</sup>B220<sup>+</sup>CD11b<sup>-</sup>) among CD45<sup>+</sup>CD19<sup>-</sup>NK1.1<sup>-</sup>CD11c<sup>+</sup> cells in tumor draining lymph nodes from PBS or C+I vaccine treated mice ( $n=3$ , mean $\pm$ SEM, Student's t-test). (C) The C+I vaccine stimulates cancer cell specific IFN $\gamma$ <sup>+</sup> cytotoxic T cells in**

Increased percentage of serum IgG binding to miPSCs and murine PDAC cancer cells from C+I vaccine treated mice compared to PBS treated controls, without a significant increase in non-specific fibroblast binding ( $n=3$ , mean  $\pm$  SEM, Student's t-test). Percentage of pDCs (CD45<sup>+</sup>CD11c<sup>+</sup>NK1.1<sup>-</sup>B220<sup>+</sup>CD11b<sup>-</sup>) among CD45<sup>+</sup>CD19<sup>-</sup>NK1.1<sup>-</sup>CD11c<sup>+</sup> cells in tumor draining lymph nodes from PBS or C+I vaccine treated mice ( $n=3$ , mean  $\pm$  SEM, Student's t-test). The C+I vaccine stimulates cancer cell specific IFN $\gamma$ <sup>+</sup> cytotoxic T cells in



spleen upon re-exposure to cancer cell lysate compared to PBS controls. Quantification of frequencies of CD8<sup>+</sup> IFN $\gamma$ <sup>+</sup> cytotoxic lymphocytes in mouse spleens from C+I vaccine or PBS control treated mice upon exposure to Panc02 lysate or PBS (n=3-4, mean  $\pm$  SEM, \*P < 0.05, Student's t-test). **(D)** Quantification of frequencies of CD3<sup>+</sup>Granzyme B<sup>+</sup>, IL-2, or IFN $\gamma$ <sup>+</sup> lymphocytes in mouse spleens (n=3-4, means  $\pm$  SEM, \*P < 0.05, Tukey's multiple comparisons test). **(E)** No significant difference among different groups in terms of mouse body weights (g) was observed. (n=7-8, mean  $\pm$  SEM, n.s., not significant, Tukey's multiple comparisons test).

**Supplementary Figure 4. Shared upregulated genes in mouse and human iPSCs and pancreatic cancer cell lines.** **(A)** Heatmap showing the hierarchical clustering of upregulated genes in mouse iPSC (miPSC.37\_rep1, miPSC.37\_rep2, miPSC.42\_rep1, miPSC.42\_rep2), mouse pancreatic cancer cell line Panc02 cells (mPanc02\_SY4 and mPanc02\_SY13), human iPSC clones (hiPSC\_rep1 and hiPSC\_rep2), human pancreatic cancer cell lines (hPan\_Capan1, hPan\_BxPC3, hPan\_Aspc1, and hPan\_Panc1) compared to mouse embryonic fibroblasts (MEF\_rep1 and MEF\_rep2) and human adult fibroblasts (hFB\_rep1 and hFB\_rep1). **(B-C)** Enrichment plots by gene set enrichment analysis (GSEA) for the iPSC cancer gene signature in Panc02 cells and murine iPSCs (miPSCs). iPSC cancer gene signature is significantly enriched in both Panc02 cells and miPSCs, while negatively correlated to mouse embryonic fibroblasts (MEFs). Normalized enrichment scores (NESs), false discovery rate (FDR) q values, and P-values were computed by GSEA.

## **Supplemental Tables**

**Supplementary Table 1.** iPSC-cancer signature gene table.

**Supplementary Table 2.** iPSC-cancer signature genes in immune system related pathways.

**Supplementary Table 3.** Immunogenic iPSC-cancer signature genes and peptides.

## References

- Amir, E.D., Davis, K.L., Tadmor, M.D., Simonds, E.F., Levine, J.H., Bendall, S.C., Shenfeld, D.K., Krishnaswamy, S., Nolan, G.P., and Pe'er, D. (2013). viSNE enables visualization of high dimensional single-cell data and reveals phenotypic heterogeneity of leukemia. *Nat Biotechnol* *31*, 545–552.
- Anders, S., and Huber, W. (2010). Differential expression analysis for sequence count data. *Genome Biology* *11*, R106.
- Armenia, J., Wankowicz, S.A.M., Liu, D., Gao, J., Kundra, R., Reznik, E., Chatila, W.K., Chakravarty, D., Han, G.C., Coleman, I., et al. (2018). The long tail of oncogenic drivers in prostate cancer. *Nat. Genet.* *50*, 645–651.
- Bagrodia, A., Lee, B.H., Lee, W., Cha, E.K., Sfakianos, J.P., Iyer, G., Pietzak, E.J., Gao, S.P., Zabor, E.C., Ostrovnya, I., et al. (2016). Genetic determinants of cisplatin resistance in patients with advanced germ cell tumors. *J. Clin. Oncol.* *34*, 4000–4007.
- Brennan, C.W., Verhaak, R.G.W., McKenna, A., Campos, B., Noushmehr, H., Salama, S.R., Zheng, S., Chakravarty, D., Sanborn, J.Z., Berman, S.H., et al. (2013). The somatic genomic landscape of glioblastoma. *Cell* *155*, 462–477.
- Campbell, J.D., Alexandrov, A., Kim, J., Wala, J., Berger, A.H., Peadarallu, C.S., Shukla, S.A., Guo, G., Brooks, A.N., Murray, B.A., et al. (2016). Distinct patterns of somatic genome alterations in lung adenocarcinomas and squamous cell carcinomas. *Nat. Genet.* *48*, 607–616.
- Cerami, E., Gao, J., Dogrusoz, U., Gross, B.E., Sumer, S.O., Aksoy, B.A., Jacobsen, A., Byrne, C.J., Heuer, M.L., Larsson, E., et al. (2012). The cBio cancer genomics portal: an Open platform for exploring multidimensional cancer genomics data. *Cancer Discov* *2*, 401–404.
- Ciriello, G., Gatza, M.L., Beck, A.H., Wilkerson, M.D., Rhie, S.K., Pastore, A., Zhang, H., McLellan, M., Yau, C., Kandoth, C., et al. (2015). Comprehensive molecular portraits of invasive lobular breast cancer. *Cell* *163*, 506–519.
- Diecke, S., Lu, J., Lee, J., Termglinchan, V., Kooreman, N.G., Burrige, P.W., Ebert, A.D., Churko, J.M., Sharma, A., Kay, M.A., et al. (2015). Novel codon-optimized mini-intronic plasmid for efficient, inexpensive, and xeno-free induction of pluripotency. *Sci Rep* *5*.
- Dobin, A., Davis, C.A., Schlesinger, F., Drenkow, J., Zaleski, C., Jha, S., Batut, P., Chaisson, M., and Gingeras, T.R. (2013). STAR: ultrafast universal RNA-seq aligner. *Bioinformatics* *29*, 15–21.
- Gao, J., Aksoy, B.A., Dogrusoz, U., Dresdner, G., Gross, B., Sumer, S.O., Sun, Y., Jacobsen, A., Sinha, R., Larsson, E., et al. (2013). Integrative analysis of complex cancer genomics and clinical profiles using the cBioPortal. *Sci Signal* *6*, p11.

- Gassen, S.V., Callebaut, B., Helden, M.J.V., Lambrecht, B.N., Demeester, P., Dhaene, T., and Saeys, Y. (2015). FlowSOM: Using self-organizing maps for visualization and interpretation of cytometry data. *Cytometry Part A* *87*, 636–645.
- Hoadley, K.A., Yau, C., Hinoue, T., Wolf, D.M., Lazar, A.J., Drill, E., Shen, R., Taylor, A.M., Cherniack, A.D., Thorsson, V., et al. (2018). Cell-of-origin patterns dominate the molecular classification of 10,000 tumors from 33 types of cancer. *Cell* *173*, 291-304.e6.
- Kooreman, N.G., Kim, Y., de Almeida, P.E., Termglinchan, V., Diecke, S., Shao, N.-Y., Wei, T.-T., Yi, H., Dey, D., Nelakanti, R., et al. (2018). Autologous iPSC-based vaccines elicit anti-tumor responses in vivo. *Cell Stem Cell* *22*, 501-513.e7.
- Kotecha, N., Krutzik, P.O., and Irish, J.M. (2010). Web-based analysis and publication of flow cytometry experiments. *Curr Protoc Cytom Chapter 10*, Unit10.17.
- Li, B., and Dewey, C.N. (2011). RSEM: accurate transcript quantification from RNA-Seq data with or without a reference genome. *BMC Bioinformatics* *12*, 323.
- Liao, Y., Smyth, G.K., and Shi, W. (2014). featureCounts: an efficient general purpose program for assigning sequence reads to genomic features. *Bioinformatics* *30*, 923–930.
- Qiu, P., Simonds, E.F., Bendall, S.C., Gibbs, K.D., Bruggner, R.V., Linderman, M.D., Sachs, K., Nolan, G.P., and Plevritis, S.K. (2011). Extracting a cellular hierarchy from high-dimensional cytometry data with SPADE. *Nat. Biotechnol.* *29*, 886–891.
- Silva, J., Barrandon, O., Nichols, J., Kawaguchi, J., Theunissen, T.W., and Smith, A. (2008). Promotion of reprogramming to ground state pluripotency by signal inhibition. *PLoS Biol.* *6*, e253.
- Subramanian, A., Tamayo, P., Mootha, V.K., Mukherjee, S., Ebert, B.L., Gillette, M.A., Paulovich, A., Pomeroy, S.L., Golub, T.R., Lander, E.S., et al. (2005). Gene set enrichment analysis: a knowledge-based approach for interpreting genome-wide expression profiles. *Proc Natl Acad Sci U S A* *102*, 15545–15550.
- Witkiewicz, A.K., McMillan, E.A., Balaji, U., Baek, G., Lin, W.-C., Mansour, J., Mollaei, M., Wagner, K.-U., Koduru, P., Yopp, A., et al. (2015). Whole-exome sequencing of pancreatic cancer defines genetic diversity and therapeutic targets. *Nature Communications* *6*, 1–11.

# Supplementary Figure 1

## Tumor H&E staining

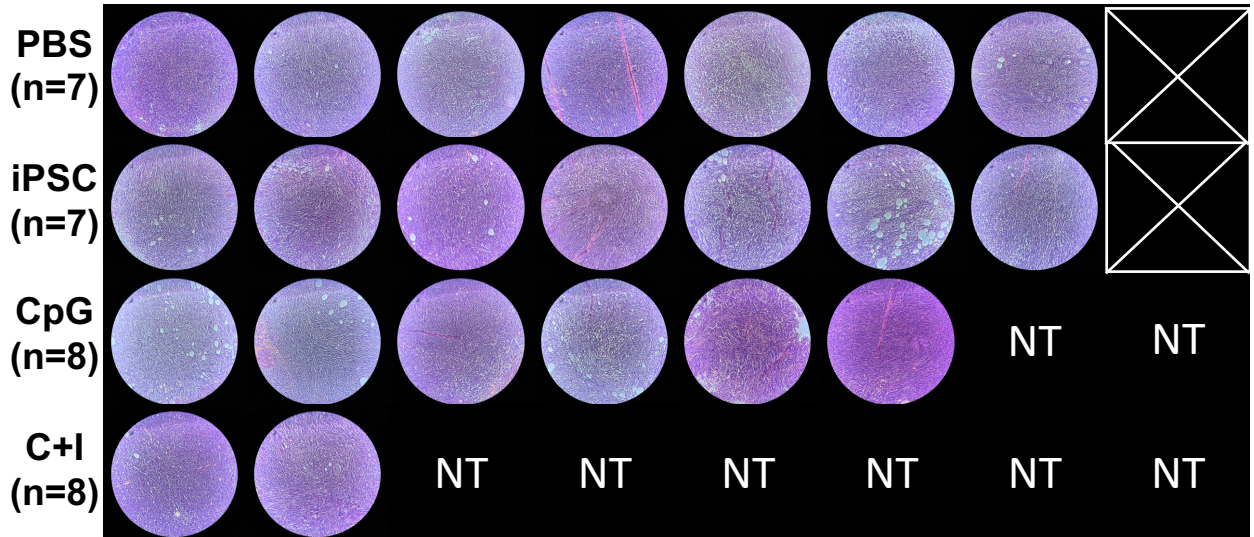

NT , No Tumors.

# Supplementary Figure 2

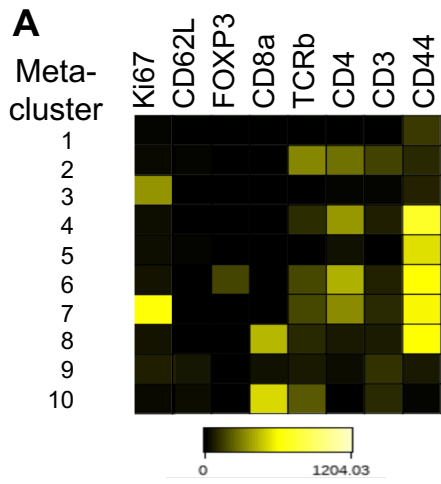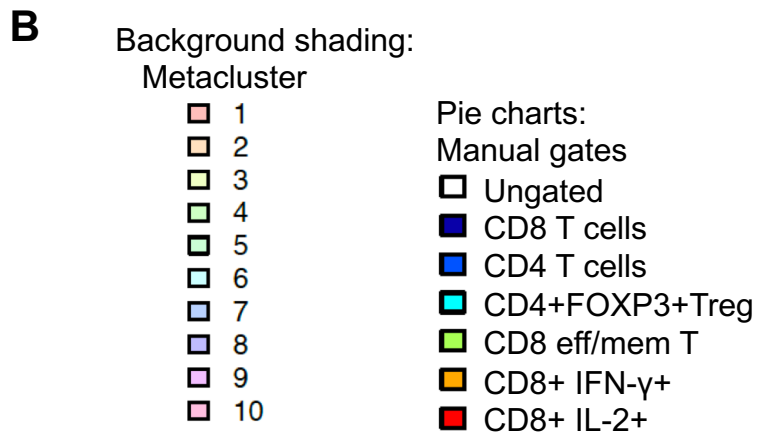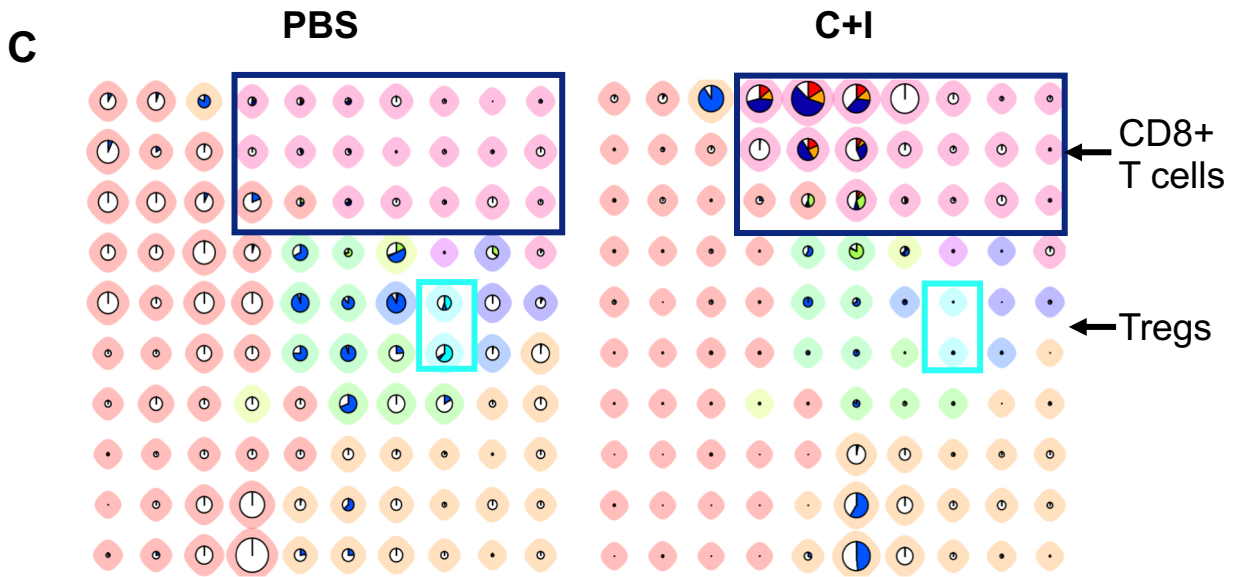

# Supplementary Figure 3

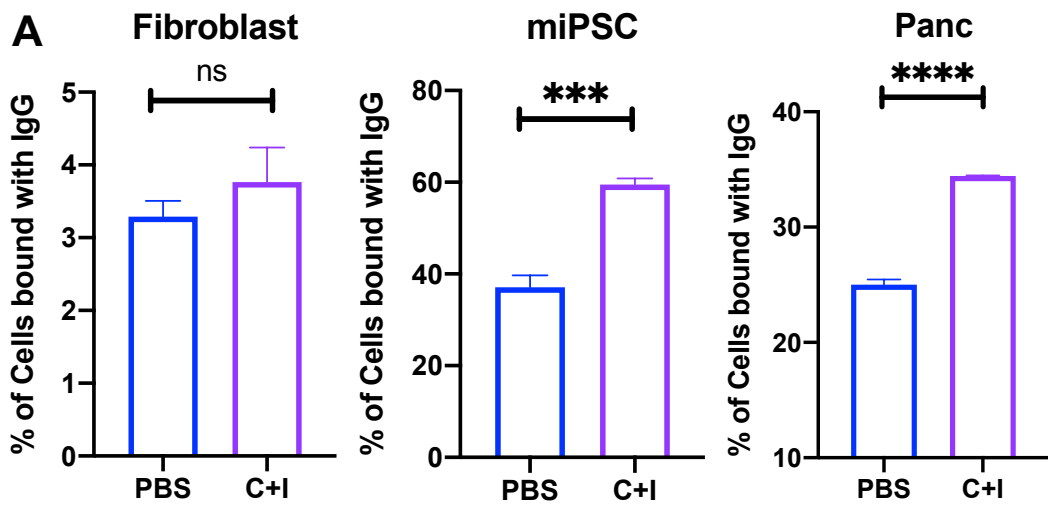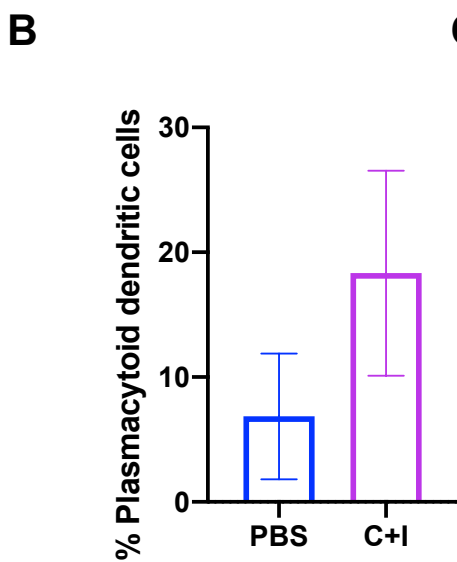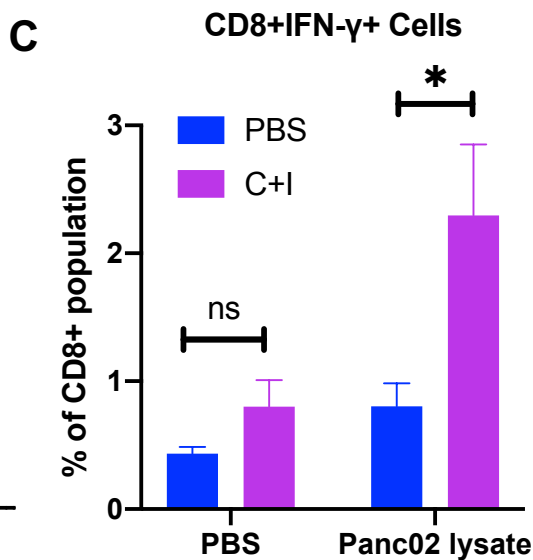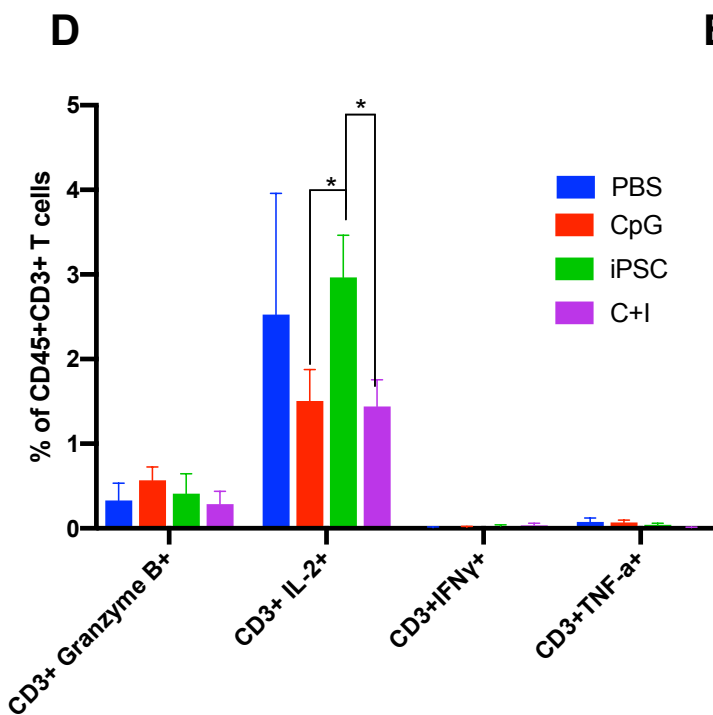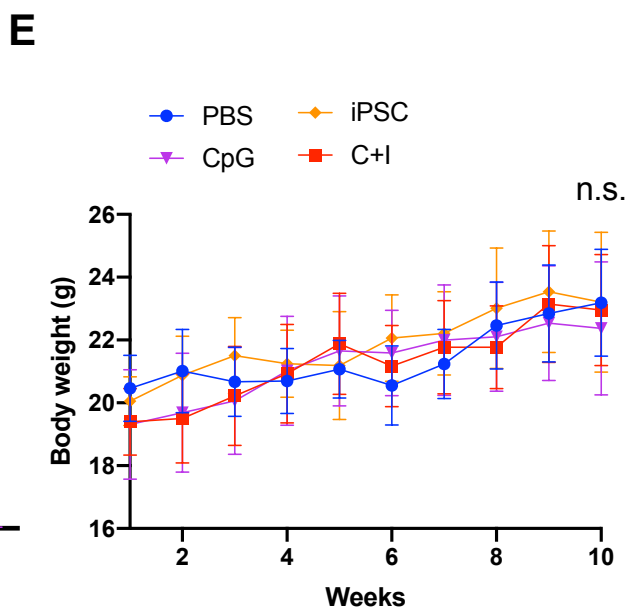

# Supplementary Figure 4

**A**

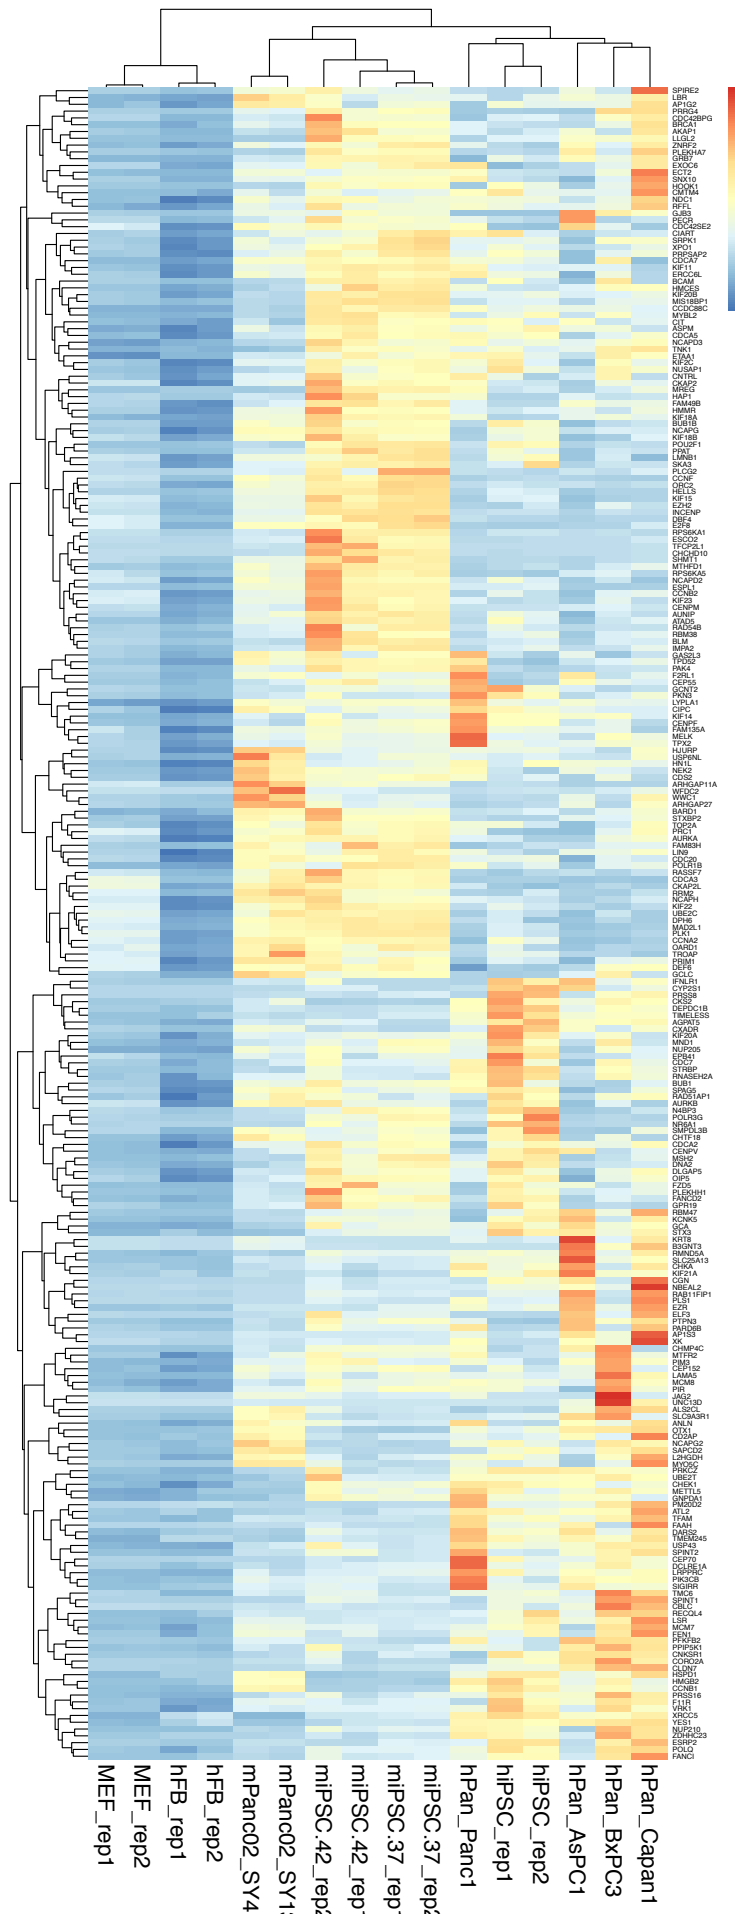

**B**

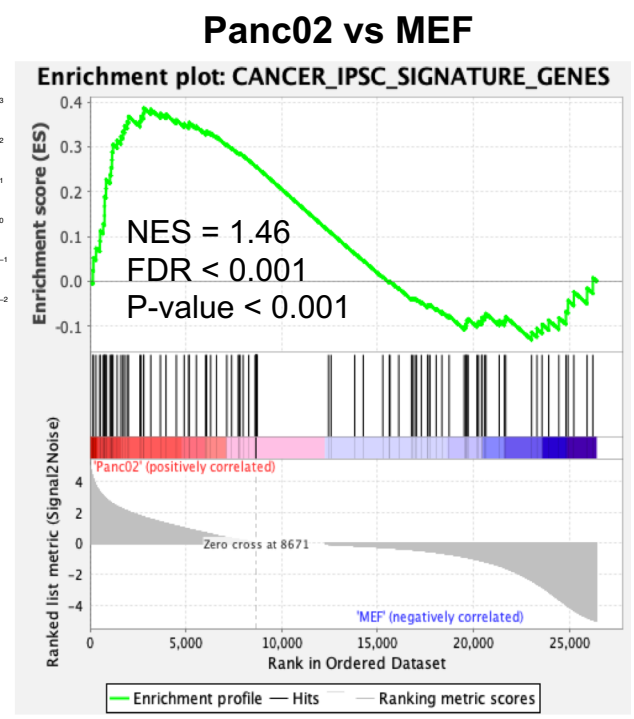

**C**

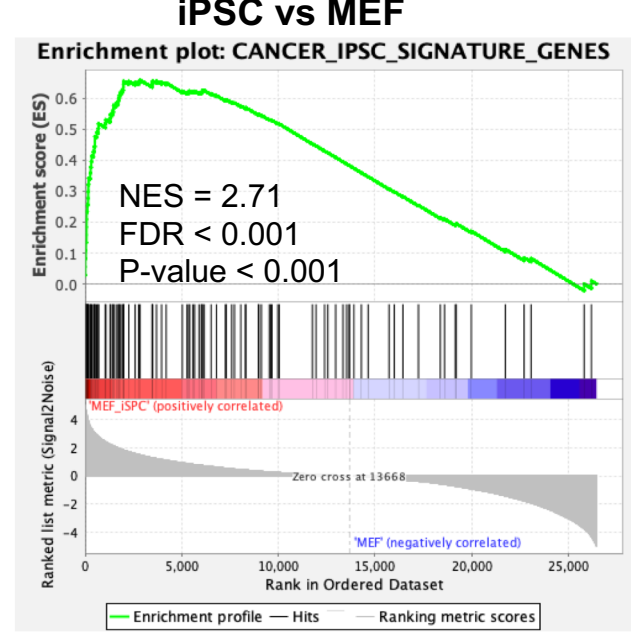



**Table S1. iPSC-Cancer Signature Genes**

| Gene ID                           | Gene Symbol     | Gene Family                                                   | Protein Class                                                   |
|-----------------------------------|-----------------|---------------------------------------------------------------|-----------------------------------------------------------------|
| HUMAN HGNC=370 UniProtKB=Q02952   | <i>AKAP12</i>   | A-kinase anchor protein 12;                                   |                                                                 |
| HUMAN HGNC=14082 UniProtKB=Q9NQW6 | <i>ANLN</i>     | Anillin;                                                      |                                                                 |
| HUMAN HGNC=11110 UniProtKB=O14497 | <i>ARID1A</i>   | AT-rich interactive domain-containing protein 1A;             |                                                                 |
| HUMAN HGNC=19048 UniProtKB=Q8IZT6 | <i>ASPM</i>     | Abnormal spindle-like microcephaly-associated protein;        |                                                                 |
| HUMAN HGNC=18318 UniProtKB=Q8IXJ9 | <i>ASXL1</i>    | Putative Polycomb group protein ASXL1;                        |                                                                 |
| HUMAN HGNC=794 UniProtKB=P31939   | <i>ATIC</i>     | Bifunctional purine biosynthesis protein PURH;                | hydrolase(PC00121);methyltransferase(PC00155)                   |
| HUMAN HGNC=11393 UniProtKB=O14965 | <i>AURKA</i>    | Aurora kinase A;                                              | non-receptor serine/threonine protein kinase(PC00167)           |
| HUMAN HGNC=952 UniProtKB=Q99728   | <i>BARD1</i>    | BRCA1-associated RING domain protein 1;                       |                                                                 |
| HUMAN HGNC=14347 UniProtKB=Q9H6U6 | <i>BCAS3</i>    | Breast carcinoma-amplified sequence 3;                        |                                                                 |
| HUMAN HGNC=20893 UniProtKB=Q6W2J9 | <i>BCOR</i>     | BCL-6 corepressor;                                            |                                                                 |
| HUMAN HGNC=1058 UniProtKB=P54132  | <i>BLM</i>      | Bloom syndrome protein;                                       |                                                                 |
| HUMAN HGNC=1100 UniProtKB=P38398  | <i>BRCA1</i>    | Breast cancer type 1 susceptibility protein;                  | ubiquitin-protein ligase(PC00234)                               |
| HUMAN HGNC=1101 UniProtKB=P51587  | <i>BRCA2</i>    | Breast cancer type 2 susceptibility protein;                  | damaged DNA-binding protein(PC00086)                            |
| HUMAN HGNC=1103 UniProtKB=P25440  | <i>BRD2</i>     | Bromodomain-containing protein 2;                             |                                                                 |
| HUMAN HGNC=1104 UniProtKB=Q15059  | <i>BRD3</i>     | Bromodomain-containing protein 3;                             |                                                                 |
| HUMAN HGNC=13575 UniProtKB=O60885 | <i>BRD4</i>     | Bromodomain-containing protein 4;                             |                                                                 |
| HUMAN HGNC=20473 UniProtKB=Q9BX63 | <i>BRIPI</i>    | Fanconi anemia group J protein;                               | DNA helicase(PC00011)                                           |
| HUMAN HGNC=1148 UniProtKB=O43683  | <i>BUB1</i>     | Mitotic checkpoint serine/threonine-protein kinase BUB1;      |                                                                 |
| HUMAN HGNC=1149 UniProtKB=O60566  | <i>BUB1B</i>    | Mitotic checkpoint serine/threonine-protein kinase BUB1 beta; |                                                                 |
| HUMAN HGNC=1493 UniProtKB=P49589  | <i>CARS</i>     | Cysteine--tRNA ligase, cytoplasmic;                           | RNA binding protein(PC00031);aminoacyl-tRNA synthetase(PC00047) |
| HUMAN HGNC=1578 UniProtKB=P20248  | <i>CCNA2</i>    | Cyclin-A2;                                                    | kinase activator(PC00138)                                       |
| HUMAN HGNC=1579 UniProtKB=P14635  | <i>CCNB1</i>    | G2/mitotic-specific cyclin-B1;                                | kinase activator(PC00138)                                       |
| HUMAN HGNC=19437 UniProtKB=Q9NPC3 | <i>CCNB1IP1</i> | E3 ubiquitin-protein ligase CCNB1IP1;                         |                                                                 |
| HUMAN HGNC=1589 UniProtKB=P24864  | <i>CCNE1</i>    | G1/S-specific cyclin-E1;                                      | kinase activator(PC00138)                                       |

|                                   |               |                                                       |                                                                                                               |
|-----------------------------------|---------------|-------------------------------------------------------|---------------------------------------------------------------------------------------------------------------|
| HUMAN HGNC=1591 UniProtKB=P41002  | <i>CCNF</i>   | Cyclin-F;                                             | kinase activator(PC00138)                                                                                     |
| HUMAN HGNC=1725 UniProtKB=P30304  | <i>CDC25A</i> | M-phase inducer phosphatase 1;                        | protein phosphatase(PC00195)                                                                                  |
| HUMAN HGNC=1727 UniProtKB=P30307  | <i>CDC25C</i> | M-phase inducer phosphatase 3;                        | protein phosphatase(PC00195)                                                                                  |
| HUMAN HGNC=1744 UniProtKB=Q99741  | <i>CDC6</i>   | Cell division control protein 6 homolog;              |                                                                                                               |
| HUMAN HGNC=1722 UniProtKB=P06493  | <i>CDK1</i>   | Cyclin-dependent kinase 1;                            | non-receptor serine/threonine protein kinase(PC00167);non-receptor tyrosine protein kinase(PC00168)           |
| HUMAN HGNC=1729 UniProtKB=P21127  | <i>CDK11B</i> | Cyclin-dependent kinase 11B;                          | non-receptor serine/threonine protein kinase(PC00167);non-receptor tyrosine protein kinase(PC00168)           |
| HUMAN HGNC=1772 UniProtKB=Q00526  | <i>CDKN3</i>  | Cyclin-dependent kinase 3;                            | non-receptor serine/threonine protein kinase(PC00167);non-receptor tyrosine protein kinase(PC00168)           |
| HUMAN HGNC=1857 UniProtKB=P49454  | <i>CENPF</i>  | Centromere protein F;                                 |                                                                                                               |
| HUMAN HGNC=1917 UniProtKB=O14647  | <i>CHD2</i>   | Chromodomain-helicase-DNA-binding protein 2;          |                                                                                                               |
| HUMAN HGNC=16627 UniProtKB=O96017 | <i>CHEK2</i>  | Serine/threonine-protein kinase Chk2;                 |                                                                                                               |
| HUMAN HGNC=1858 UniProtKB=Q7Z7A1  | <i>CNTRL</i>  | Centriolin;                                           |                                                                                                               |
| HUMAN HGNC=2348 UniProtKB=Q92793  | <i>CREBBP</i> | CREB-binding protein;                                 | acetyltransferase(PC00038);chromatin /chromatin-binding protein(PC00077);transcription cofactor(PC00217)      |
| HUMAN HGNC=18677 UniProtKB=Q9NXZ2 | <i>DDX43</i>  | Probable ATP-dependent RNA helicase DDX43;            |                                                                                                               |
| HUMAN HGNC=3115 UniProtKB=O00716  | <i>E2F3</i>   | Transcription factor E2F3;                            | nucleic acid binding(PC00171);transcription factor(PC00218)                                                   |
| HUMAN HGNC=3155 UniProtKB=Q9H8V3  | <i>ECT2</i>   | Protein ECT2;                                         |                                                                                                               |
| HUMAN HGNC=3279 UniProtKB=Q99613  | <i>EIF3C</i>  | Eukaryotic translation initiation factor 3 subunit C; | translation initiation factor(PC00224)                                                                        |
| HUMAN HGNC=1316 UniProtKB=Q9HC35  | <i>EML4</i>   | Echinoderm microtubule-associated protein-like 4;     |                                                                                                               |
| HUMAN HGNC=3373 UniProtKB=Q09472  | <i>EP300</i>  | Histone acetyltransferase p300;                       | acetyltransferase(PC00038);chromatin /chromatin-binding protein(PC00077);transcription cofactor(PC00217)      |
| HUMAN HGNC=11958 UniProtKB=Q96L91 | <i>EP400</i>  | E1A-binding protein p400;                             |                                                                                                               |
| HUMAN HGNC=5174 UniProtKB=Q7Z444  | <i>ERAS</i>   | GTPase ERas;                                          | small GTPase(PC00208)                                                                                         |
| HUMAN HGNC=27234 UniProtKB=Q86X53 | <i>ERICH1</i> | Glutamate-rich protein 1;                             |                                                                                                               |
| HUMAN HGNC=3494 UniProtKB=P41161  | <i>ETV5</i>   | ETS translocation variant 5;                          | nucleic acid binding(PC00171);signaling molecule(PC00207);winged helix/forkhead transcription factor(PC00246) |

|                                   |                 |                                                    |                                                                                                                      |
|-----------------------------------|-----------------|----------------------------------------------------|----------------------------------------------------------------------------------------------------------------------|
| HUMAN HGNC=3527 UniProtKB=Q15910  | <i>EZH2</i>     | Histone-lysine N-methyltransferase EZH2;           |                                                                                                                      |
| HUMAN HGNC=3585 UniProtKB=Q9BXW9  | <i>FANCD2</i>   | Fanconi anemia group D2 protein;                   |                                                                                                                      |
| HUMAN HGNC=13584 UniProtKB=Q9UKT4 | <i>FBXO5</i>    | F-box only protein 5;                              |                                                                                                                      |
| HUMAN HGNC=3682 UniProtKB=P08620  | <i>FGF4</i>     | Fibroblast growth factor 4;                        | growth factor(PC00112)                                                                                               |
| HUMAN HGNC=3683 UniProtKB=P12034  | <i>FGF5</i>     | Fibroblast growth factor 5;                        | growth factor(PC00112)                                                                                               |
| HUMAN HGNC=3686 UniProtKB=P55075  | <i>FGF8</i>     | Fibroblast growth factor 8;                        | growth factor(PC00112)                                                                                               |
| HUMAN HGNC=19752 UniProtKB=Q8N3X1 | <i>FNBP4</i>    | Formin-binding protein 4;                          |                                                                                                                      |
| HUMAN HGNC=3797 UniProtKB=P53539  | <i>FOSB</i>     | Protein fosB;                                      | basic leucine zipper transcription factor(PC00056)                                                                   |
| HUMAN HGNC=3806 UniProtKB=O00358  | <i>FOXE1</i>    | Forkhead box protein E1;                           | DNA binding protein(PC00009);winged helix/forkhead transcription factor(PC00246)                                     |
| HUMAN HGNC=4066 UniProtKB=Q13480  | <i>GAB1</i>     | GRB2-associated-binding protein 1;                 | transmembrane receptor regulatory/adaptor protein(PC00226)                                                           |
| HUMAN HGNC=26881 UniProtKB=Q17RS7 | <i>GEN1</i>     | Flap endonuclease GEN homolog 1;                   | damaged DNA-binding protein(PC00086);endodeoxyribonuclease(PC00093);exodeoxyribonuclease(PC00098);hydrolase(PC00121) |
| HUMAN HGNC=5009 UniProtKB=P52926  | <i>HMG2</i>     | High mobility group protein HMGL-C;                | DNA binding protein(PC00009)                                                                                         |
| HUMAN HGNC=5125 UniProtKB=P31276  | <i>HOXC13</i>   | Homeobox protein Hox-C13;                          |                                                                                                                      |
| HUMAN HGNC=5258 UniProtKB=P08238  | <i>HSP90AB1</i> | Heat shock protein HSP 90-beta;                    | Hsp90 family chaperone(PC00028)                                                                                      |
| HUMAN HGNC=16389 UniProtKB=Q96EW2 | <i>HSPBAP1</i>  | HSPB1-associated protein 1;                        |                                                                                                                      |
| HUMAN HGNC=17582 UniProtKB=Q8WYB5 | <i>KAT6B</i>    | Histone acetyltransferase KAT6B;                   | acetyltransferase(PC00038);chromatin/chromatin-binding protein(PC00077);zinc finger transcription factor(PC00244)    |
| HUMAN HGNC=13610 UniProtKB=Q8NHM5 | <i>KDM2B</i>    | Lysine-specific demethylase 2B;                    |                                                                                                                      |
| HUMAN HGNC=23025 UniProtKB=Q8TD94 | <i>KLF14</i>    | Krüppel-like factor 14;                            | DNA binding protein(PC00009);transcription cofactor(PC00217);zinc finger transcription factor(PC00244)               |
| HUMAN HGNC=6763 UniProtKB=Q13257  | <i>MAD2L1</i>   | Mitotic spindle assembly checkpoint protein MAD2A; |                                                                                                                      |
| HUMAN HGNC=6879 UniProtKB=Q16659  | <i>MAPK6</i>    | Mitogen-activated protein kinase 6;                | non-receptor serine/threonine protein kinase(PC00167)                                                                |
| HUMAN HGNC=6940 UniProtKB=P10911  | <i>MCF2</i>     | Proto-oncogene DBL;                                | signaling molecule(PC00207)                                                                                          |
| HUMAN HGNC=6973 UniProtKB=Q00987  | <i>MDM2</i>     | E3 ubiquitin-protein ligase Mdm2;                  | chromatin/chromatin-binding protein(PC00077)                                                                         |
| HUMAN HGNC=13363 UniProtKB=Q9H2W2 | <i>MIXL1</i>    | Homeobox protein MIXL1;                            |                                                                                                                      |

|                                   |                |                                                     |                                                                                                                |
|-----------------------------------|----------------|-----------------------------------------------------|----------------------------------------------------------------------------------------------------------------|
| HUMAN HGNC=7127 UniProtKB=P40692  | <i>MLH1</i>    | DNA mismatch repair protein Mlh1;                   | DNA binding protein(PC00009)                                                                                   |
| HUMAN HGNC=7325 UniProtKB=P43246  | <i>MSH2</i>    | DNA mismatch repair protein Msh2;                   | DNA binding protein(PC00009)                                                                                   |
| HUMAN HGNC=7329 UniProtKB=P52701  | <i>MSH6</i>    | DNA mismatch repair protein Msh6;                   | DNA binding protein(PC00009)                                                                                   |
| HUMAN HGNC=23784 UniProtKB=Q9BTC8 | <i>MTA3</i>    | Metastasis-associated protein MTA3;                 | chromatin/chromatin-binding protein(PC00077);histone(PC00118)                                                  |
| HUMAN HGNC=3942 UniProtKB=P42345  | <i>MTOR</i>    | Serine/threonine-protein kinase mTOR;               | non-receptor serine/threonine protein kinase(PC00167);nucleic acid binding(PC00171);nucleotide kinase(PC00172) |
| HUMAN HGNC=7547 UniProtKB=P10243  | <i>MYBL1</i>   | Myb-related protein A;                              |                                                                                                                |
| HUMAN HGNC=7559 UniProtKB=P04198  | <i>MYCN</i>    | N-myc proto-oncogene protein;                       | basic helix-loop-helix transcription factor(PC00055);nucleic acid binding(PC00171)                             |
| HUMAN HGNC=7670 UniProtKB=Q9Y6Q9  | <i>NCOA3</i>   | Nuclear receptor coactivator 3;                     | acetyltransferase(PC00038);transcription factor(PC00218)                                                       |
| HUMAN HGNC=7857 UniProtKB=P30419  | <i>NMT1</i>    | Glycylpeptide N-tetradecanoyltransferase 1;         | transferase(PC00220)                                                                                           |
| HUMAN HGNC=18016 UniProtKB=Q8WUM0 | <i>NUP133</i>  | Nuclear pore complex protein Nup133;                |                                                                                                                |
| HUMAN HGNC=8522 UniProtKB=P32243  | <i>OTX2</i>    | Homeobox protein OTX2;                              | homeodomain transcription factor(PC00119)                                                                      |
| HUMAN HGNC=26144 UniProtKB=Q86YC2 | <i>PALB2</i>   | Partner and localizer of BRCA2;                     |                                                                                                                |
| HUMAN HGNC=8729 UniProtKB=P12004  | <i>PCNA</i>    | Proliferating cell nuclear antigen;                 | DNA polymerase processivity factor(PC00015)                                                                    |
| HUMAN HGNC=14005 UniProtKB=Q86TG7 | <i>PEG10</i>   | Retrotransposon-derived protein PEG10;              |                                                                                                                |
| HUMAN HGNC=8987 UniProtKB=Q9P1W9  | <i>PIM2</i>    | Serine/threonine-protein kinase pim-2;              | serine/threonine protein kinase receptor(PC00205)                                                              |
| HUMAN HGNC=9045 UniProtKB=Q6DJT9  | <i>PLAG1</i>   | Zinc finger protein PLAG1;                          | KRAB box transcription factor(PC00029)                                                                         |
| HUMAN HGNC=9221 UniProtKB=Q01860  | <i>POU5F1</i>  | POU domain, class 5, transcription factor 1;        |                                                                                                                |
| HUMAN HGNC=9347 UniProtKB=Q13029  | <i>PRDM2</i>   | PR domain zinc finger protein 2;                    |                                                                                                                |
| HUMAN HGNC=9822 UniProtKB=O15315  | <i>RAD51B</i>  | DNA repair protein RAD51 homolog 2;                 |                                                                                                                |
| HUMAN HGNC=14428 UniProtKB=Q9H2T7 | <i>RANBP17</i> | Ran-binding protein 17;                             | transfer/carrier protein(PC00219)                                                                              |
| HUMAN HGNC=9965 UniProtKB=Q9P2R6  | <i>RERE</i>    | Arginine-glutamic acid dipeptide repeats protein;   |                                                                                                                |
| HUMAN HGNC=9966 UniProtKB=Q13127  | <i>REST</i>    | RE1-silencing transcription factor;                 | KRAB box transcription factor(PC00029)                                                                         |
| HUMAN HGNC=10315 UniProtKB=P35268 | <i>RPL22</i>   | 60S ribosomal protein L22;                          | ribosomal protein(PC00202)                                                                                     |
| HUMAN HGNC=10451 UniProtKB=P23921 | <i>RRM1</i>    | Ribonucleoside-diphosphate reductase large subunit; | reductase(PC00198)                                                                                             |
| HUMAN HGNC=20256 UniProtKB=Q5VUG0 | <i>SFMBT2</i>  | Scm-like with four MBT domains protein 2;           | chromatin/chromatin-binding protein(PC00077);transcription factor(PC00218)                                     |

|                                   |               |                                                                   |                                                       |
|-----------------------------------|---------------|-------------------------------------------------------------------|-------------------------------------------------------|
| HUMAN HGNC=10901 UniProtKB=Q13309 | <i>SKP2</i>   | S-phase kinase-associated protein 2;                              |                                                       |
| HUMAN HGNC=11195 UniProtKB=P48431 | <i>SOX2</i>   | Transcription factor SOX-2;                                       | HMG box transcription factor(PC00024)                 |
| HUMAN HGNC=11199 UniProtKB=P41225 | <i>SOX3</i>   | Transcription factor SOX-3;                                       | HMG box transcription factor(PC00024)                 |
| HUMAN HGNC=10879 UniProtKB=Q15468 | <i>STIL</i>   | SCL-interrupting locus protein;                                   |                                                       |
| HUMAN HGNC=11524 UniProtKB=Q9Y6A5 | <i>TACC3</i>  | Transforming acidic coiled-coil-containing protein 3;             |                                                       |
| HUMAN HGNC=11648 UniProtKB=P56279 | <i>TCL1A</i>  | T-cell leukemia/lymphoma protein 1A;                              |                                                       |
| HUMAN HGNC=11701 UniProtKB=P13385 | <i>TDGF1</i>  | Teratocarcinoma-derived growth factor 1;                          | calcium-binding protein(PC00060)                      |
| HUMAN HGNC=29484 UniProtKB=Q8NFU7 | <i>TET1</i>   | Methylcytosine dioxygenase TET1;                                  |                                                       |
| HUMAN HGNC=11752 UniProtKB=P19532 | <i>TFE3</i>   | Transcription factor E3;                                          |                                                       |
| HUMAN HGNC=11805 UniProtKB=Q13009 | <i>TIAM1</i>  | T-lymphoma invasion and metastasis-inducing protein 1;            |                                                       |
| HUMAN HGNC=11989 UniProtKB=P11388 | <i>TOP2A</i>  | DNA topoisomerase 2-alpha;                                        |                                                       |
| HUMAN HGNC=7146 UniProtKB=Q7Z4N2  | <i>TRPM1</i>  | Transient receptor potential cation channel subfamily M member 1; | ion channel(PC00133);receptor(PC00197)                |
| HUMAN HGNC=20071 UniProtKB=Q53GS9 | <i>USP39</i>  | U4/U6.U5 tri-snRNP-associated protein 2;                          | cysteine protease(PC00081)                            |
| HUMAN HGNC=12718 UniProtKB=Q99986 | <i>VRK1</i>   | Serine/threonine-protein kinase VRK1;                             | non-receptor serine/threonine protein kinase(PC00167) |
| HUMAN HGNC=8014 UniProtKB=P67809  | <i>YBX1</i>   | Nuclease-sensitive element-binding protein 1;                     |                                                       |
| HUMAN HGNC=9397 UniProtKB=Q9ULU4  | <i>ZMYND8</i> | Protein kinase C-binding protein 1;                               |                                                       |
| HUMAN HGNC=13099 UniProtKB=P13682 | <i>ZNF35</i>  | Zinc finger protein 35;                                           | KRAB box transcription factor(PC00029)                |

**Table S2. iPSC-Cancer Signature Genes In Immune System Related Pathways**

| Pathway name                        | # of genes found | # of total gene in the pathway | Species name | Genes found in pathway                                               |
|-------------------------------------|------------------|--------------------------------|--------------|----------------------------------------------------------------------|
| Adaptive Immune System              | 4                | 1003                           | Homo sapiens | ASXL1; CCNF; SKP2; MTOR                                              |
| Cytokine Signaling in Immune system | 3                | 1108                           | Homo sapiens | SOX2; NUP133; MTOR                                                   |
| Innate Immune System                | 4                | 1331                           | Homo sapiens | CREBBP; ATIC; HSP90AB1; EP300                                        |
| Immune System                       | 10               | 2713                           | Homo sapiens | SOX2; ASXL1; CREBBP; ATIC; HSP90AB1; NUP133; CCNF; EP300; SKP2; MTOR |

**Table S3. Immunogenic iPSC-Cancer Signature Genes and Peptides**

| <b>Gene ID</b> | <b>MHC I Peptide</b> | <b>MHC II Peptide</b> | <b>Position</b> | <b>MHC-I Coverage %</b> | <b>MHC-II Coverage %</b> | <b>IEDB Evidence Number</b> |
|----------------|----------------------|-----------------------|-----------------|-------------------------|--------------------------|-----------------------------|
| <i>ASPM</i>    | MIIAVTSYK            | QSRIRMIIAVTSYKR       | 1382            | 55                      | 100                      | 1                           |
|                | RMHRLHMRY            | IQSTFRMHRLHMRYQ       | 2345            | 50                      | 100                      | 1                           |
|                | FAMKVLASY            | FRAYIFAMKVLASYQ       | 1620            | 50                      | 100                      | 4                           |
|                | FQVDISLNL            | IAFAFQVDISLNLQ        | 1054            | 50                      | 100                      | 0                           |
|                | LAMFILNRL            | GLAMFILNRLLNWNP       | 846             | 50                      | 100                      | 0                           |
|                | RAYKLYLAV            | RAYKLYLAVKNANKQ       | 3125            | 50                      | 100                      | 0                           |
|                | FLNVRASAI            | RTRFLNVRASAIHQ        | 2996            | 100                     | 100                      | 0                           |
| <i>ATIC</i>    | KAFTHTAQY            | LKAFTHTAQYDEAIS       | 176             | 50                      | 100                      | 1                           |
|                | YTQSNSVCY            | TIAVKYTQSNSVCYA       | 426             | 100                     | 100                      | 1                           |
| <i>BRD4</i>    | FAWPFQQPV            | HQFAWPFQQPVDAVK       | 78              | 100                     | 100                      | 1                           |
| <i>CARS1</i>   | ALLENIALY            | RPNQALLENIALYLT       | 541             | 50                      | 100                      | 22                          |
|                | YVNSGVSFY            | DNGYGYVNSGVSFYD       | 261             | 100                     | 100                      | 7                           |
| <i>CREBBP</i>  | QQMRTLNPL            | HQQMRTLNPLGNNPM       | 515             | 60                      | 100                      | 0                           |
| <i>EP300</i>   | LMFNNAWLY            | DDIWLNFNNAWLYNR       | 1122            | 65                      | 100                      | 1                           |
|                | YLDVHFFR             | VYISYLDVHFFRPK        | 1396            | 50                      | 100                      | 7                           |
|                | YSYQNRHYF            | DATYYSYQNRHYFCE       | 1191            | 50                      | 100                      | 3                           |
| <i>ERICH1</i>  | FSYWITLIL            | AFFSYWITLILPEKS       | 428             | 50                      | 100                      | 0                           |
| <i>MTOR</i>    | HPQALIYPL            | HPQALIYPLTVASKS       | 1967            | 50                      | 100                      | 1                           |
|                | LEWLRRSL             | KDDWLEWLRRSLSEL       | 1280            | 50                      | 100                      | 1                           |
|                | LQHYVTMEL            | ELQHYVTMELREMSQ       | 43              | 50                      | 100                      | 4                           |
|                | MPFLRKMLI            | NPAFVMPFLRKMLIQ       | 726             | 50                      | 100                      | 2                           |
|                | YAMKHFGEI            | VLEYAMKHFGELEIQ       | 1434            | 55                      | 100                      | 0                           |
|                | YASRIIHPI            | SLDFTDYASRIIHPI       | 1150            | 60                      | 100                      | 2                           |
| <i>NUP133</i>  | RERSSFYSL            | RERSSFYSLTSSNIS       | 280             | 50                      | 100                      | 0                           |
|                | YSWDINRAL            | EKHAYSWDINRALKE       | 307             | 100                     | 100                      | 0                           |
| <i>PEG10</i>   | QTYPTYAAY            | IPGYQTYPTYAAYPT       | 636             | 55                      | 100                      | 0                           |
|                | FMMEMKHVF            | PAFMMEMKHFVDFDQ       | 149             | 65                      | 100                      | 2                           |
|                | YAAYPYTPV            | YPTYAAYPTYTPVGF       | 641             | 50                      | 100                      | 5                           |
|                | YVAQNGIPL            | FIDHEYVAQNGIPLR       | 381             | 100                     | 100                      | 2                           |
| <i>RRM1</i>    | IHYDRDFSY            | SAIHYDRDFSYNYFG       | 134             | 60                      | 100                      | 8                           |
|                | RVYNNTARY            | LRVYNNTARYVDQGG       | 276             | 60                      | 100                      | 14                          |
|                | FQIVNPHLL            | SGEFQIVNPHLLKDL       | 633             | 50                      | 100                      | 49                          |
